# Supplementary material for: From Neural Stem Cells (NSC) to Glioblastoma (GBM): A Natural History of GBM Recapitulated in Vitro
Source: Preprints.org preprint supplement (doi:10.20944/preprints202008.0637.v1), 2020-08-28
Supplement: Supplementary file 1 [file supplementary]

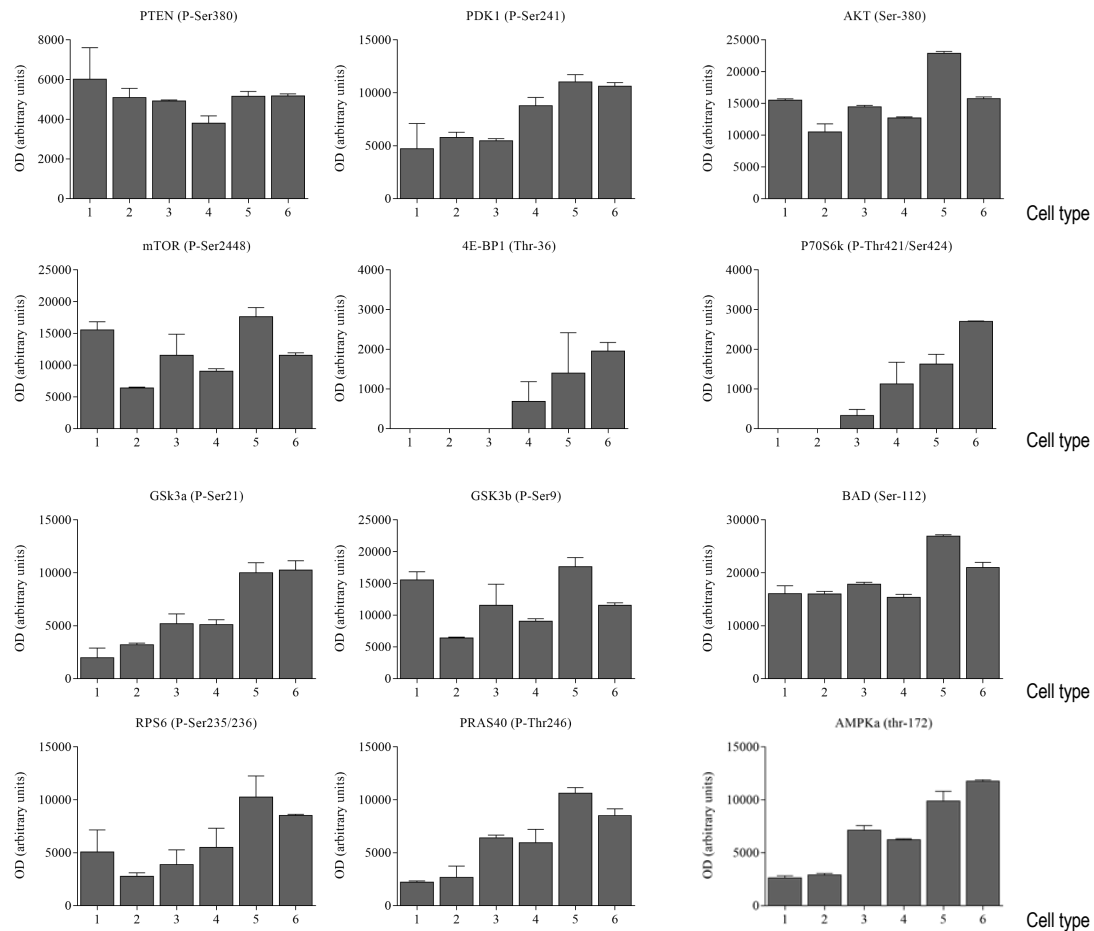

**Suppl. Fig. 1. Patterns of phosphorylation of signalling proteins throughout the transformation process.** Primary (cell type 1), LP-immortalized NSC (cell type 2), HP-immortalized NSC (cell type 3), GBM-derived cells (cell type 4) or metastasis-derived cells (cell types 5 and 6) were cultured and the phosphorylation levels of different signalling proteins was investigated. All cells with proteins involved in the Ras/Raf/ERK pathway, no clear pattern of activation was observed in the other proteins investigated. This includes, surprisingly, the leading members of the PI3K/Akt/mTOR pathway.
