# Supplementary material for: From Neural Stem Cells (NSC) to Glioblastoma (GBM): A Natural History of GBM Recapitulated in Vitro
Source: Preprints.org preprint supplement (doi:10.20944/preprints202008.0637.v1), 2020-08-28
Supplement: Supplementary file 3 [file supplementary]

Archive with 2 entries (2 files):
- Supplementary Materials.pdf
- __MACOSX/._Supplementary Materials.pdf
